# Supplementary material for: The ion channel TRPM4 in murine experimental autoimmune encephalomyelitis and in a model of glutamate-induced neuronal degeneration
Source: PubMed Central journal article supplement (PMC6042389; doi:10.1186/s13041-018-0385-4), 2018-07-11
Supplement: 13041_2018_385_MOESM1_ESM.pdf [file 13041_2018_385_MOESM1_ESM.pdf]

## Statistical Power Calculation of WB experiment (Figure 2C and E)

```
. power twomeans 11 40, sd1(3) sd2(2) alpha(.05) power(0.9)
```

```
Performing iteration ...
```

```
Estimated sample sizes for a two-sample means test  
Satterthwaite's t test assuming unequal variances  
Ho: m2 = m1 versus Ha: m2 != m1
```

```
Study parameters:
```

```
alpha = 0.0500  
power = 0.9000  
delta = 29.0000  
m1 = 11.0000  
m2 = 40.0000  
sd1 = 3.0000  
sd2 = 2.0000
```

```
Estimated sample sizes:
```

```
N = 4  
N per group = 2
```

## Statistical Power Calculation of qPCR experiment (Figure 2D)

```
. power twomeans 36 96, sd1(7) sd2(6) alpha(.05) power(0.9)
```

```
Performing iteration ...
```

```
Estimated sample sizes for a two-sample means test  
Satterthwaite's t test assuming unequal variances  
Ho: m2 = m1 versus Ha: m2 != m1
```

```
Study parameters:
```

```
alpha = 0.0500  
power = 0.9000  
delta = 60.0000  
m1 = 36.0000  
m2 = 96.0000  
sd1 = 7.0000  
sd2 = 6.0000
```

```
Estimated sample sizes:
```

```
N = 4  
N per group = 2
```

We artificially reduced the difference and transformed the values multiplying by 100, because the estimated power was not achievable given the domain limits of the power function.
